# Supplementary material
Source: PubMed Central journal article supplement (PMC6446203)
Supplement: EMBR-20-e46989-s001.pdf [file EMBR-20-e46989-s001.pdf]

## **Appendix files:**

1. [Appendix Figure S1](#). Cis1 is not required for GFP-Pex15 $\Delta$ 30 degradation. (Page 2)
2. [Appendix Figure S2](#). Thermo-stability and sensitivity to limited trypsin digestion of Msp1 and its N-domain mutants. (Page 3)
3. [Appendix Table S1](#). List of non-mitochondrial TA proteins. (Page 4-5)
4. [Appendix Table S2](#). Yeast strains used and generated in this study. (Page 6-14)
5. [Appendix Table S3](#). Plasmids used in this study. (Page 15-17)

## Appendix Figure S1

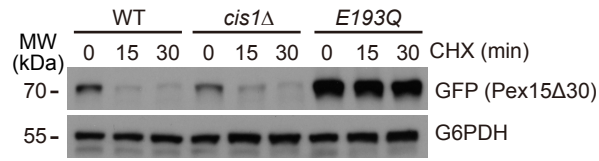

Appendix Figure S1. Cis1 is not required for GFP-Pex15 $\Delta$ 30 degradation.

GFP-Pex15 $\Delta$ 30 was expressed in the indicated strains from a centromeric plasmid under the control of TEF1 promoter.

Cells were grown in SCD media to log phase, treated with CHX and collected at the indicated time points.

## Appendix Figure S2

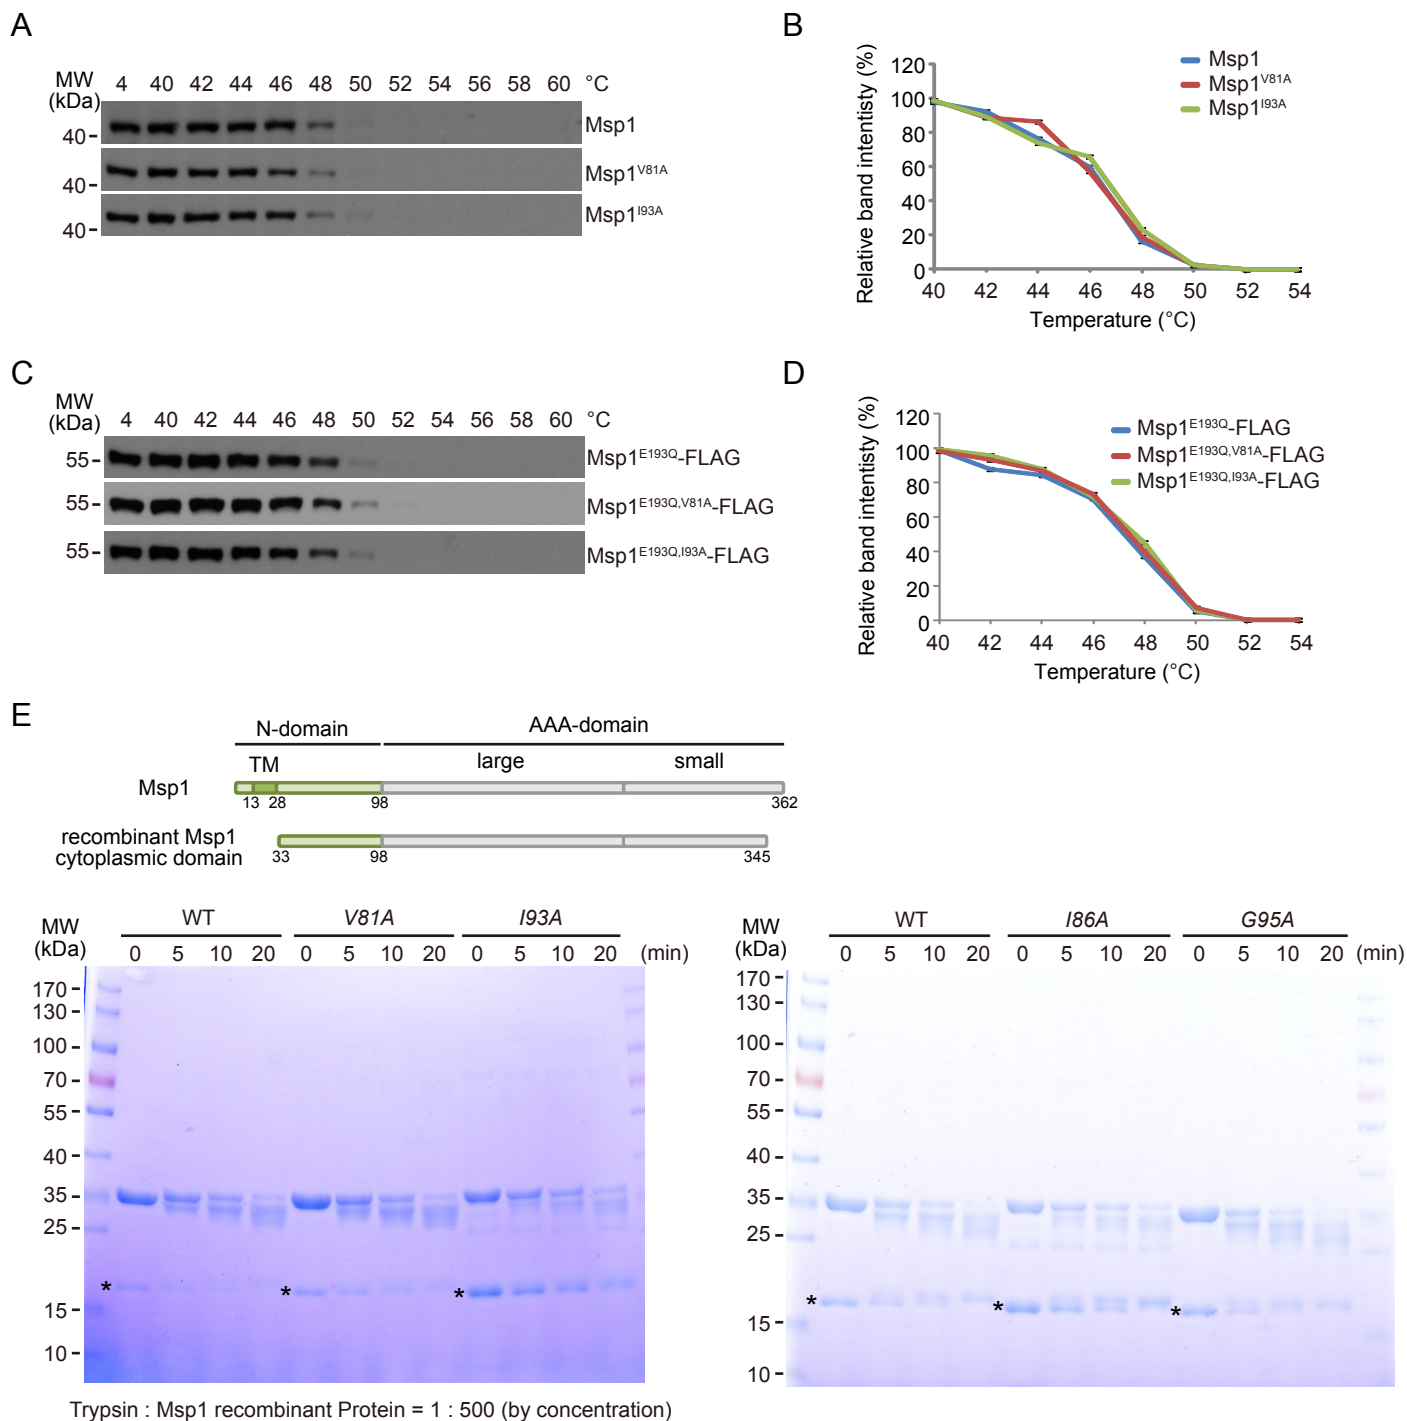

Appendix Figure S2. Thermo-stability and sensitivity to limited trypsin digestion of Msp1 and its N-domain mutants.

(A-D) In (A) and (C), cell extracts were heated at indicated temperatures for 3 minutes and centrifuged to collect supernatants. Equal volume of supernatants was loaded for western blot analysis. In (B) and (D), band intensities were measured by ImageJ and plotted against temperature. Data values represent means  $\pm$  SEM from three independent experiments.

(E) Recombinant proteins of Msp1 cytoplasmic domain and its indicated mutants were digested with 1/500 (by concentration) trypsin at 37 °C for the indicated time. About 15  $\mu$ g recombinant proteins were loaded for SDS-PAGE and Coomassie Blue Staining. Asterisks indicate contaminant proteins.

Table S1 Non-mitochondrial TA proteins

| Protein      | Localization in WT cells  | mitochondrial localization in get3Δmsp1Δ cells | TM gravy | Tail charge | TM segment (bold) and C-terminal tail (red) sequence         |
|--------------|---------------------------|------------------------------------------------|----------|-------------|--------------------------------------------------------------|
| <b>Pex15</b> | peroxisome                | Yes                                            | 1.7      | 5.4         | VLNKNGLLLTGLLLLLCL <b>KKYKSLMAIFKHVPAAFHTVYPQIVGLLKLLASI</b> |
| <b>Fr1</b>   | ER                        | Yes                                            | 2.3      | 2.9         | YFIIDIIAFLLMGGFIVYVKNLLTRFFTR                                |
| Sbh1         | ER                        | no                                             | 2.8      | 1.9         | VVLFLAVGFIFSVALHVISKVAGKLF                                   |
| Bos1         | ER,Golgi                  | no                                             | 2.8      | 1.9         | LFWIALILLIIGIYYVL <b>KWLR</b>                                |
| Vti1         | Golgi-vacuole             | no                                             | 3.2      | 1.9         | FISYAIHAVLILLLVLF <b>SKFK</b>                                |
| Sso1         | plasma membrane           | no                                             | 3.4      | 1.9         | WLIVFAIIVVVVVVVVPAV <b>VKTR</b>                              |
| Pgc1         | ER                        | no                                             | 1.8      | 1.1         | VHIKLCGWSIAYVIFLFL <b>RTIHFL</b>                             |
| Fr2          | ER                        | no                                             | 2.6      | 1.1         | IVFLHHVICYTFKHLV <b>SHK</b>                                  |
| Sbh2         | ER                        | no                                             | 2.7      | 1.1         | LVVFLSVGFIFSVALHLL <b>TKFTHII</b>                            |
| Sec22        | ER                        | no                                             | 2        | 0.9         | ISQYAPIVIVAFFVFLFW <b>IFLK</b>                               |
| Sft1         | Golgi                     | no                                             | 2        | 0.9         | SIWRMVGALLIFFILYTLF <b>KLF</b>                               |
| Prm3         | nuclear envelope          | no                                             | 1.1      | 0.9         | YQGAIFGSFLGAAVTTVLSNLA <b>VKALQN</b>                         |
| Kar1         | nuclear envelope          | no                                             | 1.7      | 0.9         | YFLWTICILILLYCNIYV <b>YRF</b>                                |
| YEL073C      |                           | no                                             | 0.7      | 0.9         | TSGYYAFSTVVPVLMGNM <b>KVA</b>                                |
| YCL007C      |                           | no                                             | 1.8      | 0.9         | YKLLITLCSLLFVGPL <b>FLKV</b>                                 |
| <b>Sss1</b>  | ER                        | Yes                                            | 1.9      | 0.9         | AVGIGFIAVGIHGYAIKLIHIPIRY <b>VIV</b>                         |
| <b>Ubc6</b>  | ER                        | Yes                                            | 2.5      | 0.9         | SMVYIGIAIFLFLVGL <b>FMK</b>                                  |
| <b>Vps64</b> | ER                        | Yes                                            | 2.2      | 0.9         | GMLFGVVAISFGLVATAV <b>KQLPQ</b>                              |
| <b>Far10</b> | ER and punctate           | Yes                                            | 2.3      | 0.9         | FTLLTFGTISIGIIAIV <b>FKILSPN</b>                             |
| Phm6         | vacuole                   | no                                             | 2.8      | 0.9         | LIIVHIVLLLYSLTMVGLFYVM <b>TMTKFLF</b>                        |
| Scs2         | ER                        | no                                             | 2.9      | 0.9         | MGIFILVALLLVLGWF <b>YR</b>                                   |
| Snc1         | plasma membrane & vesicle | no                                             | 3.1      | 0.9         | MCLALVHILLVVHIVPIAV <b>HFSR</b>                              |
| Pep12        | Golgi-vacuole             | no                                             | 3.5      | 0.9         | VYLLIVLLVMLLFIFL <b>IMKL</b>                                 |
| Sso2         | plasma membrane           | no                                             | 3.3      | 0.9         | CLHCFHFAIVVVVVVPSV <b>VETRK</b>                              |
| Dpml         | ER                        | no                                             | 1.8      | 0.1         | LILFITFWSILFFYVCYQ <b>LYHLVF</b>                             |



Table S1 Non-mitochondrial TA proteins (continued)

| Protein     | Localization in WT cells  | mitochondrial localization in get3Δmsp1Δ cells | TM gravy   | Tail charge | TM segment (bold) and C-terminal tail (red) sequence                                                |
|-------------|---------------------------|------------------------------------------------|------------|-------------|-----------------------------------------------------------------------------------------------------|
| Snz2        | plasma membrane & vesicle | no                                             | 3.7        | 0.1         | CLFLVVIILLVVIIPIVV <b>HFS</b>                                                                       |
| <b>Gos1</b> | Golgi                     | <b>Yes</b>                                     | <b>2.4</b> | <b>-0.1</b> | AFVLATITTLCLFLFFTW                                                                                  |
| <b>Sps2</b> | plasma membrane           | <b>Yes</b>                                     | <b>1.9</b> | <b>-0.1</b> | IFIDAFKMSVYAVFTVLF <b>SIIF</b>                                                                      |
| <b>Ysy6</b> | ER                        | <b>Yes</b>                                     | <b>2.1</b> | <b>-0.1</b> | WLGILLFLLVGGGVLQLIS <b>YIL</b>                                                                      |
| Hlj1        | ER                        | no                                             | 3.3        | -0.1        | MLVLFHIFVLP <b>MIKDYLFS</b>                                                                         |
| YDL241w     |                           | no                                             | 1.3        | -0.1        | SHSLAKFTILF <b>MLVLYTIV</b>                                                                         |
| YJL119c     |                           | no                                             | 1.8        | -0.1        | AITVFFVFLYINKASV <b>KFFFFA</b>                                                                      |
| Bet1        | ER,Golgi                  | no                                             | 1.9        | -0.1        | GISIKTWLIFFMVGV <b>LFFVWVIT</b>                                                                     |
| YEL010w     |                           | no                                             | 1.9        | -0.1        | LSSFSIILSAVFPD <b>VLFTFLFS</b>                                                                      |
| YBR016w     | plasma membrane           | no                                             | 2          | -0.1        | GCLAACLAALCICCT <b>MDMLF</b>                                                                        |
| Nyv1        | Golgi-vacuole             | no                                             | 2.1        | -0.1        | TLLTFHILFVSA <b>AFMFFYLW</b>                                                                        |
| Cyb5        | ER                        | no                                             | 2.4        | -1.1        | GTLVVILAILMLGV <b>AYYLLNE</b>                                                                       |
| Use1        | ER                        | no                                             | 2.5        | -0.1        | SYLFYITVFIFMILGLV <b>FTFHIIQLFPAL</b>                                                               |
| Sed5        | Golgi                     | no                                             | 2.7        | -0.1        | WLAAKVFFHIFVFF <b>VIWVLVN</b>                                                                       |
| Tlg1        | Golgi                     | no                                             | 3.6        | -0.1        | CIGLLIVVLIVLL <b>VLAFAIA</b>                                                                        |
| Syn8        | Golgi-vacuole             | no                                             | 3.6        | -0.1        | NCVILVLIVV <b>LLLLLLVL</b>                                                                          |
| Vam3        | vacuole                   | no                                             | 3.6        | -0.1        | VTLHIVVCMV <b>VLLAVLS</b>                                                                           |
| YBL100c     | ER                        | no                                             | 1.8        | -2.1        | AAVRANIHCACFF <b>YLCYCSCDSYES</b>                                                                   |
| Sec20       | ER                        | no                                             | 1.9        | -2.8        | LWLLFKFFKGILV <b>TLGLVKSYAGSSSSLQAPSLVLNAPILATTTTSSATSVEPFASVSAVSSI</b><br><b>QRAVDEAVDRIVSHDEL</b> |
| Ufe1        | ER                        | no                                             | 2.1        | -1.1        | TTYGAHMGV <b>FILFLDYVG</b>                                                                          |
| Csm4        | ER                        | no                                             | 2.5        | -1.1        | LNSLIHFFISL <b>VFLWVSIIEV</b>                                                                       |
| Tlg2        | Golgi                     | no                                             | 3.2        | -8.3        | VILLTLCVIAL <b>FFVMLKPHGGGSGGRNNGSNKYNNDDNKTVNNSHDDGSNTHINDEES</b><br><b>NLPSIVEVTESENDALDDLL</b>   |
| YML036w     |                           | ND                                             | ND         | ND          | No TM predicted                                                                                     |
| YDL012c     | plasma membrane           | ND                                             | ND         | ND          | No TM predicted                                                                                     |

Table S2 Yeast Strains Used and Generated in This Study

Strains generated in the background of BY4741

| NO. | Genotype                                                                                                      |
|-----|---------------------------------------------------------------------------------------------------------------|
| 1   | <i>MATa his3Δ0 leu2Δ0 met15Δ0 ura3Δ0 msp1::kanMX6</i>                                                         |
| 2   | <i>MATa his3Δ0 leu2Δ0 met15Δ0 ura3Δ0 msp1::MSP1-FLAG::LEU2</i>                                                |
| 3   | <i>MATa his3Δ0 leu2Δ0 met15Δ0 ura3Δ0 msp1::msp1 (E193Q)-FLAG::LEU2</i>                                        |
| 4   | <i>MATa his3Δ0 leu2Δ0 met15Δ0 ura3Δ0 cdc48::ADH<sup>P</sup>-FLAG-CDC48::LEU2</i>                              |
| 5   | <i>MATa his3Δ0 leu2Δ0 met15Δ0 ura3Δ0 cdc48::ADH<sup>P</sup>-FLAG-cdc48-3 (cdc48-P257L,R387K)::LEU2,kanMX6</i> |
| 6   | <i>MATa his3Δ0 leu2Δ0 met15Δ0 ura3Δ0 ho::TEF1<sup>P</sup>-MTS-TagBFP (mtBFP)::natNT2</i>                      |
| 7   | <i>MATa his3Δ0 leu2Δ0 met15Δ0 ura3Δ0 msp1::msp1 (E193Q)::LEU2</i>                                             |
| 8   | <i>MATa his3Δ0 leu2Δ0 met15Δ0 ura3Δ0 msp1::msp1<sup>TM</sup> (Δ1-32)::LEU2</i>                                |
| 9   | <i>MATa his3Δ0 leu2Δ0 met15Δ0 ura3Δ0 msp1::msp1 (L122D,L123D)-FLAG::LEU2</i>                                  |
| 10  | <i>MATa his3Δ0 leu2Δ0 met15Δ0 ura3Δ0 msp1::msp1 (K8A)-FLAG::LEU2</i>                                          |
| 11  | <i>MATa his3Δ0 leu2Δ0 met15Δ0 ura3Δ0 msp1::msp1 (T9A)-FLAG::LEU2</i>                                          |
| 12  | <i>MATa his3Δ0 leu2Δ0 met15Δ0 ura3Δ0 msp1::msp1 (I10A)-FLAG::LEU2</i>                                         |
| 13  | <i>MATa his3Δ0 leu2Δ0 met15Δ0 ura3Δ0 msp1::msp1 (T11A)-FLAG::LEU2</i>                                         |
| 14  | <i>MATa his3Δ0 leu2Δ0 met15Δ0 ura3Δ0 msp1::msp1 (D12T)-FLAG::LEU2</i>                                         |
| 15  | <i>MATa his3Δ0 leu2Δ0 met15Δ0 ura3Δ0 msp1::msp1 (L13A,S14A)-FLAG::LEU2</i>                                    |
| 16  | <i>MATa his3Δ0 leu2Δ0 met15Δ0 ura3Δ0 msp1::msp1 (L16A)-FLAG::LEU2</i>                                         |
| 17  | <i>MATa his3Δ0 leu2Δ0 met15Δ0 ura3Δ0 msp1::msp1 (V17A,G18A)-FLAG::LEU2</i>                                    |
| 18  | <i>MATa his3Δ0 leu2Δ0 met15Δ0 ura3Δ0 msp1::msp1 (T19A)-FLAG::LEU2</i>                                         |
| 19  | <i>MATa his3Δ0 leu2Δ0 met15Δ0 ura3Δ0 msp1::msp1 (I21A,S22A)-FLAG::LEU2</i>                                    |
| 20  | <i>MATa his3Δ0 leu2Δ0 met15Δ0 ura3Δ0 msp1::msp1 (L23A)-FLAG::LEU2</i>                                         |
| 21  | <i>MATa his3Δ0 leu2Δ0 met15Δ0 ura3Δ0 msp1::msp1 (Y24A)-FLAG::LEU2</i>                                         |
| 22  | <i>MATa his3Δ0 leu2Δ0 met15Δ0 ura3Δ0 msp1::msp1 (V27A)-FLAG::LEU2</i>                                         |
| 23  | <i>MATa his3Δ0 leu2Δ0 met15Δ0 ura3Δ0 msp1::msp1 (R29A,N32A)-FLAG::LEU2</i>                                    |
| 24  | <i>MATa his3Δ0 leu2Δ0 met15Δ0 ura3Δ0 msp1::msp1 (L30A,L31A)-FLAG::LEU2</i>                                    |
| 25  | <i>MATa his3Δ0 leu2Δ0 met15Δ0 ura3Δ0 msp1::msp1 (V34A,E35A)-FLAG::LEU2</i>                                    |
| 26  | <i>MATa his3Δ0 leu2Δ0 met15Δ0 ura3Δ0 msp1::msp1 (V67A)-FLAG::LEU2</i>                                         |
| 27  | <i>MATa his3Δ0 leu2Δ0 met15Δ0 ura3Δ0 msp1::msp1 (L69A)-FLAG::LEU2</i>                                         |
| 28  | <i>MATa his3Δ0 leu2Δ0 met15Δ0 ura3Δ0 msp1::msp1 (Y72A)-FLAG::LEU2</i>                                         |
| 29  | <i>MATa his3Δ0 leu2Δ0 met15Δ0 ura3Δ0 msp1::msp1 (E73A)-FLAG::LEU2</i>                                         |

Table S2 Yeast Strains Used and Generated in This Study (Continued)

Strains generated in the background of BY4741

| NO. | Genotype                                                                                                                    |
|-----|-----------------------------------------------------------------------------------------------------------------------------|
| 30  | <i>MATa his3Δ0 leu2Δ0 met15Δ0 ura3Δ0 msp1::msp1 (I76A)-FLAG::LEU2</i>                                                       |
| 31  | <i>MATa his3Δ0 leu2Δ0 met15Δ0 ura3Δ0 msp1::msp1 (L77A)-FLAG::LEU2</i>                                                       |
| 32  | <i>MATa his3Δ0 leu2Δ0 met15Δ0 ura3Δ0 msp1::msp1 (I80A)-FLAG::LEU2</i>                                                       |
| 33  | <i>MATa his3Δ0 leu2Δ0 met15Δ0 ura3Δ0 msp1::msp1 (V81A)-FLAG::LEU2</i>                                                       |
| 34  | <i>MATa his3Δ0 leu2Δ0 met15Δ0 ura3Δ0 msp1::msp1 (I86A)-FLAG::LEU2</i>                                                       |
| 35  | <i>MATa his3Δ0 leu2Δ0 met15Δ0 ura3Δ0 msp1::msp1 (I88A)-FLAG::LEU2</i>                                                       |
| 36  | <i>MATa his3Δ0 leu2Δ0 met15Δ0 ura3Δ0 msp1::msp1 (F90A)-FLAG::LEU2</i>                                                       |
| 37  | <i>MATa his3Δ0 leu2Δ0 met15Δ0 ura3Δ0 msp1::msp1 (D92A)-FLAG::LEU2</i>                                                       |
| 38  | <i>MATa his3Δ0 leu2Δ0 met15Δ0 ura3Δ0 msp1::msp1 (I93A)-FLAG::LEU2</i>                                                       |
| 39  | <i>MATa his3Δ0 leu2Δ0 met15Δ0 ura3Δ0 msp1::msp1 (G94A)-FLAG::LEU2</i>                                                       |
| 40  | <i>MATa his3Δ0 leu2Δ0 met15Δ0 ura3Δ0 msp1::msp1 (G95A)-FLAG::LEU2</i>                                                       |
| 41  | <i>MATa his3Δ0 leu2Δ0 met15Δ0 ura3Δ0 msp1::msp1 (L96A)-FLAG::LEU2</i>                                                       |
| 42  | <i>MATa his3Δ0 leu2Δ0 met15Δ0 ura3Δ0 msp1::msp1 (D97A)-FLAG::LEU2</i>                                                       |
| 43  | <i>MATa his3Δ0 leu2Δ0 met15Δ0 ura3Δ0 msp1::msp1 (E193Q, L122D,L123D)-FLAG::LEU2</i>                                         |
| 44  | <i>MATa his3Δ0 leu2Δ0 met15Δ0 ura3Δ0 msp1::msp1 (E193Q, D12T)-FLAG::LEU2</i>                                                |
| 45  | <i>MATa his3Δ0 leu2Δ0 met15Δ0 ura3Δ0 msp1::msp1 (E193Q, L69A)-FLAG::LEU2</i>                                                |
| 46  | <i>MATa his3Δ0 leu2Δ0 met15Δ0 ura3Δ0 msp1::msp1 (E193Q, Y72A)-FLAG::LEU2</i>                                                |
| 47  | <i>MATa his3Δ0 leu2Δ0 met15Δ0 ura3Δ0 msp1::msp1 (E193Q, E73A)-FLAG::LEU2</i>                                                |
| 48  | <i>MATa his3Δ0 leu2Δ0 met15Δ0 ura3Δ0 msp1::msp1 (E193Q, L77A)-FLAG::LEU2</i>                                                |
| 49  | <i>MATa his3Δ0 leu2Δ0 met15Δ0 ura3Δ0 msp1::msp1 (E193Q, V81A)-FLAG::LEU2</i>                                                |
| 50  | <i>MATa his3Δ0 leu2Δ0 met15Δ0 ura3Δ0 msp1::msp1 (E193Q, I86A)-FLAG::LEU2</i>                                                |
| 51  | <i>MATa his3Δ0 leu2Δ0 met15Δ0 ura3Δ0 msp1::msp1 (E193Q, I93A)-FLAG::LEU2</i>                                                |
| 52  | <i>MATa his3Δ0 leu2Δ0 met15Δ0 ura3Δ0 msp1::msp1 (E193Q, G94A)-FLAG::LEU2</i>                                                |
| 53  | <i>MATa his3Δ0 leu2Δ0 met15Δ0 ura3Δ0 msp1::msp1 (E193Q, G95A)-FLAG::LEU2</i>                                                |
| 54  | <i>MATa his3Δ0 leu2Δ0 met15Δ0 ura3Δ0 msp1::msp1 (E193Q, L96A)-FLAG::LEU2</i>                                                |
| 55  | <i>MATa his3Δ0 leu2Δ0 met15Δ0 ura3Δ0 msp1::MSP1-GFP::LEU2 ho::TEF1<sup>P</sup>-MTS-TagBFP (mtBFP)::natNT2</i>               |
| 56  | <i>MATa his3Δ0 leu2Δ0 met15Δ0 ura3Δ0 msp1::msp1 (L122D,L123D)-GFP::LEU2 ho::TEF1<sup>P</sup>-MTS-TagBFP (mtBFP)::natNT2</i> |
| 57  | <i>MATa his3Δ0 leu2Δ0 met15Δ0 ura3Δ0 msp1::msp1 (D12T)-GFP::LEU2 ho::TEF1<sup>P</sup>-MTS-TagBFP (mtBFP)::natNT2</i>        |
| 58  | <i>MATa his3Δ0 leu2Δ0 met15Δ0 ura3Δ0 msp1::msp1 (L69A)-GFP::LEU2 ho::TEF1<sup>P</sup>-MTS-TagBFP (mtBFP)::natNT2</i>        |

Table S2 Yeast Strains Used and Generated in This Study (Continued)

Strains generated in the background of BY4741

| NO. | Genotype                                                                                                                                                     |
|-----|--------------------------------------------------------------------------------------------------------------------------------------------------------------|
| 59  | <i>MATa his3Δ0 leu2Δ0 met15Δ0 ura3Δ0 msp1::msp1 (E73A)-GFP::LEU2 ho::TEF1<sup>P</sup>-MTS-TagBFP (mtBFP)::natNT2</i>                                         |
| 60  | <i>MATa his3Δ0 leu2Δ0 met15Δ0 ura3Δ0 msp1::msp1 (V81A)-GFP::LEU2 ho::TEF1<sup>P</sup>-MTS-TagBFP (mtBFP)::natNT2</i>                                         |
| 61  | <i>MATa his3Δ0 leu2Δ0 met15Δ0 ura3Δ0 msp1::msp1 (Y72A)-GFP::LEU2 ho::TEF1<sup>P</sup>-MTS-TagBFP (mtBFP)::natNT2</i>                                         |
| 62  | <i>MATa his3Δ0 leu2Δ0 met15Δ0 ura3Δ0 msp1::msp1 (L77A)-GFP::LEU2 ho::TEF1<sup>P</sup>-MTS-TagBFP (mtBFP)::natNT2</i>                                         |
| 63  | <i>MATa his3Δ0 leu2Δ0 met15Δ0 ura3Δ0 msp1::msp1 (I86A)-GFP::LEU2 ho::TEF1<sup>P</sup>-MTS-TagBFP (mtBFP)::natNT2</i>                                         |
| 64  | <i>MATa his3Δ0 leu2Δ0 met15Δ0 ura3Δ0 msp1::msp1 (I93A)-GFP::LEU2 ho::TEF1<sup>P</sup>-MTS-TagBFP (mtBFP)::natNT2</i>                                         |
| 65  | <i>MATa his3Δ0 leu2Δ0 met15Δ0 ura3Δ0 msp1::msp1 (G94A)-GFP::LEU2 ho::TEF1<sup>P</sup>-MTS-TagBFP (mtBFP)::natNT2</i>                                         |
| 66  | <i>MATa his3Δ0 leu2Δ0 met15Δ0 ura3Δ0 msp1::msp1 (G95A)-GFP::LEU2 ho::TEF1<sup>P</sup>-MTS-TagBFP (mtBFP)::natNT2</i>                                         |
| 67  | <i>MATa his3Δ0 leu2Δ0 met15Δ0 ura3Δ0 msp1::msp1 (L96A)-GFP::LEU2 ho::TEF1<sup>P</sup>-MTS-TagBFP (mtBFP)::natNT2</i>                                         |
| 68  | <i>MATa his3Δ0 leu2Δ0 met15Δ0 ura3Δ0 msp1::msp1<sup>TOM70(N)</sup> (TOM70(1-32)-MSP1(33-362))-GFP::LEU2 ho::TEF1<sup>P</sup>-MTS-TagBFP (mtBFP)::natNT2</i>  |
| 69  | <i>MATa his3Δ0 leu2Δ0 met15Δ0 ura3Δ0 msp1::MSP1-GFP::LEU2</i>                                                                                                |
| 70  | <i>MATa his3Δ0 leu2Δ0 met15Δ0 ura3Δ0 msp1::msp1 (L122D,L123D)-GFP::LEU2</i>                                                                                  |
| 71  | <i>MATa his3Δ0 leu2Δ0 met15Δ0 ura3Δ0 msp1::msp1<sup>TOM70(N)</sup> (TOM70(1-32)-MSP1(33-362))-GFP::LEU2</i>                                                  |
| 72  | <i>MATa his3Δ0 leu2Δ0 met15Δ0 ura3Δ0 get3::kanMX6</i>                                                                                                        |
| 73  | <i>MATa his3Δ0 leu2Δ0 met15Δ0 ura3Δ0 msp1::kanMX6 get3::hphNT1</i>                                                                                           |
| 74  | <i>MATa his3Δ0 leu2Δ0 met15Δ0 ura3Δ0 get3::hphNT1 msp1::MSP1-GFP::LEU2</i>                                                                                   |
| 75  | <i>MATa his3Δ0 leu2Δ0 met15Δ0 ura3Δ0 get3::hphNT1 msp1::msp1 (L122D,L123D)-GFP::LEU2</i>                                                                     |
| 76  | <i>MATa his3Δ0 leu2Δ0 met15Δ0 ura3Δ0 get3::hphNT1 msp1::msp1<sup>TOM70(N)</sup> (TOM70(1-32)-MSP1(33-362))-GFP::LEU2</i>                                     |
| 77  | <i>MATa his3Δ0 leu2Δ0 met15Δ0 ura3Δ0 his3::PEX15<sup>P</sup>-GFP-PEX15::kanMX4 ho::TEF1<sup>P</sup>-MTS-TagBFP (mtBFP)::natNT2</i>                           |
| 78  | <i>MATa his3Δ0 leu2Δ0 met15Δ0 ura3Δ0 get3::hphNT1 his3::PEX15<sup>P</sup>-GFP-PEX15::kanMX4 ho::TEF1<sup>P</sup>-MTS-TagBFP (mtBFP)::natNT2</i>              |
| 79  | <i>MATa his3Δ0 leu2Δ0 met15Δ0 ura3Δ0 msp1::SpHIS5 his3::PEX15<sup>P</sup>-GFP-PEX15::kanMX4 ho::TEF1<sup>P</sup>-MTS-TagBFP (mtBFP)::natNT2</i>              |
| 80  | <i>MATa his3Δ0 leu2Δ0 met15Δ0 ura3Δ0 get3::hphNT1 msp1::SpHIS5 his3::PEX15<sup>P</sup>-GFP-PEX15::kanMX4 ho::TEF1<sup>P</sup>-MTS-TagBFP (mtBFP)::natNT2</i> |
| 81  | <i>MATa his3Δ0 leu2Δ0 met15Δ0 ura3Δ0 get3::hphNT1 msp1::MSP1-GFP::LEU2</i>                                                                                   |
| 82  | <i>MATa his3Δ0 leu2Δ0 met15Δ0 ura3Δ0 get3::hphNT1 msp1::msp1 (L122D,L123D)-GFP::LEU2</i>                                                                     |
| 83  | <i>MATa his3Δ0 leu2Δ0 met15Δ0 ura3Δ0 get3::hphNT1 msp1::msp1 (D12T)-GFP::LEU2</i>                                                                            |
| 84  | <i>MATa his3Δ0 leu2Δ0 met15Δ0 ura3Δ0 get3::hphNT1 msp1::msp1 (L69A)-GFP::LEU2</i>                                                                            |
| 85  | <i>MATa his3Δ0 leu2Δ0 met15Δ0 ura3Δ0 get3::hphNT1 msp1::msp1 (E73A)-GFP::LEU2</i>                                                                            |
| 86  | <i>MATa his3Δ0 leu2Δ0 met15Δ0 ura3Δ0 get3::hphNT1 msp1::msp1 (V81A)-GFP::LEU2</i>                                                                            |
| 87  | <i>MATa his3Δ0 leu2Δ0 met15Δ0 ura3Δ0 get3::hphNT1 msp1::msp1 (Y72A)-GFP::LEU2</i>                                                                            |

Table S2 Yeast Strains Used and Generated in This Study (Continued)

Strains generated in the background of BY4741

| NO. | Genotype                                                                                                                                                     |
|-----|--------------------------------------------------------------------------------------------------------------------------------------------------------------|
| 88  | <i>MATa his3Δ0 leu2Δ0 met15Δ0 ura3Δ0 get3::hphNT1 msp1::msp1 (L77A)-GFP::LEU2</i>                                                                            |
| 89  | <i>MATa his3Δ0 leu2Δ0 met15Δ0 ura3Δ0 get3::hphNT1 msp1::msp1 (I86A)-GFP::LEU2</i>                                                                            |
| 90  | <i>MATa his3Δ0 leu2Δ0 met15Δ0 ura3Δ0 get3::hphNT1 msp1::msp1 (I93A)-GFP::LEU2</i>                                                                            |
| 91  | <i>MATa his3Δ0 leu2Δ0 met15Δ0 ura3Δ0 get3::hphNT1 msp1::msp1 (G94A)-GFP::LEU2</i>                                                                            |
| 92  | <i>MATa his3Δ0 leu2Δ0 met15Δ0 ura3Δ0 get3::hphNT1 msp1::msp1 (G95A)-GFP::LEU2</i>                                                                            |
| 93  | <i>MATa his3Δ0 leu2Δ0 met15Δ0 ura3Δ0 get3::hphNT1 msp1::msp1 (L96A)-GFP::LEU2</i>                                                                            |
| 94  | <i>MATa his3Δ0 leu2Δ0 met15Δ0 ura3Δ0 his3::FRT1<sup>P</sup>-GFP-FRT1::kanMX4 ho::TEF1<sup>P</sup>-MTS-TagBFP (mtBFP)::natNT2</i>                             |
| 95  | <i>MATa his3Δ0 leu2Δ0 met15Δ0 ura3Δ0 get3::hphNT1 his3::FRT1<sup>P</sup>-GFP-FRT1::kanMX4 ho::TEF1<sup>P</sup>-MTS-TagBFP (mtBFP)::natNT2</i>                |
| 96  | <i>MATa his3Δ0 leu2Δ0 met15Δ0 ura3Δ0 msp1::SpHIS5 his3::FRT1<sup>P</sup>-GFP-FRT1::kanMX4 ho::TEF1<sup>P</sup>-MTS-TagBFP (mtBFP)::natNT2</i>                |
| 97  | <i>MATa his3Δ0 leu2Δ0 met15Δ0 ura3Δ0 get3::hphNT1 msp1::SpHIS5 his3::FRT1<sup>P</sup>-GFP-FRT1::kanMX4 ho::TEF1<sup>P</sup>-MTS-TagBFP (mtBFP)::natNT2</i>   |
| 98  | <i>MATa his3Δ0 leu2Δ0 met15Δ0 ura3Δ0 his3::UBC6<sup>P</sup>-GFP-UBC6::kanMX4 ho::TEF1<sup>P</sup>-MTS-TagBFP (mtBFP)::natNT2</i>                             |
| 99  | <i>MATa his3Δ0 leu2Δ0 met15Δ0 ura3Δ0 get3::hphNT1 his3::UBC6<sup>P</sup>-GFP-UBC6::kanMX4 ho::TEF1<sup>P</sup>-MTS-TagBFP (mtBFP)::natNT2</i>                |
| 100 | <i>MATa his3Δ0 leu2Δ0 met15Δ0 ura3Δ0 msp1::SpHIS5 his3::UBC6<sup>P</sup>-GFP-UBC6::kanMX4 ho::TEF1<sup>P</sup>-MTS-TagBFP (mtBFP)::natNT2</i>                |
| 101 | <i>MATa his3Δ0 leu2Δ0 met15Δ0 ura3Δ0 get3::hphNT1 msp1::SpHIS5 his3::UBC6<sup>P</sup>-GFP-UBC6::kanMX4 ho::TEF1<sup>P</sup>-MTS-TagBFP (mtBFP)::natNT2</i>   |
| 102 | <i>MATa his3Δ0 leu2Δ0 met15Δ0 ura3Δ0 his3::VPS64<sup>P</sup>-GFP-VPS64::kanMX4 ho::TEF1<sup>P</sup>-MTS-TagBFP (mtBFP)::natNT2</i>                           |
| 103 | <i>MATa his3Δ0 leu2Δ0 met15Δ0 ura3Δ0 get3::hphNT1 his3::VPS64<sup>P</sup>-GFP-VPS64::kanMX4 ho::TEF1<sup>P</sup>-MTS-TagBFP (mtBFP)::natNT2</i>              |
| 104 | <i>MATa his3Δ0 leu2Δ0 met15Δ0 ura3Δ0 msp1::SpHIS5 his3::VPS64<sup>P</sup>-GFP-VPS64::kanMX4 ho::TEF1<sup>P</sup>-MTS-TagBFP (mtBFP)::natNT2</i>              |
| 105 | <i>MATa his3Δ0 leu2Δ0 met15Δ0 ura3Δ0 get3::hphNT1 msp1::SpHIS5 his3::VPS64<sup>P</sup>-GFP-VPS64::kanMX4 ho::TEF1<sup>P</sup>-MTS-TagBFP (mtBFP)::natNT2</i> |
| 106 | <i>MATa his3Δ0 leu2Δ0 met15Δ0 ura3Δ0 his3::FAR10<sup>P</sup>-GFP-FAR10::kanMX4 ho::TEF1<sup>P</sup>-MTS-TagBFP (mtBFP)::natNT2</i>                           |
| 107 | <i>MATa his3Δ0 leu2Δ0 met15Δ0 ura3Δ0 get3::hphNT1 his3::FAR10<sup>P</sup>-GFP-FAR10::kanMX4 ho::TEF1<sup>P</sup>-MTS-TagBFP (mtBFP)::natNT2</i>              |
| 108 | <i>MATa his3Δ0 leu2Δ0 met15Δ0 ura3Δ0 msp1::SpHIS5 his3::FAR10<sup>P</sup>-GFP-FAR10::kanMX4 ho::TEF1<sup>P</sup>-MTS-TagBFP (mtBFP)::natNT2</i>              |
| 109 | <i>MATa his3Δ0 leu2Δ0 met15Δ0 ura3Δ0 get3::hphNT1 msp1::SpHIS5 his3::FAR10<sup>P</sup>-GFP-FAR10::kanMX4 ho::TEF1<sup>P</sup>-MTS-TagBFP (mtBFP)::natNT2</i> |
| 110 | <i>MATa his3Δ0 leu2Δ0 met15Δ0 ura3Δ0 his3::GOS1<sup>P</sup>-GFP-GOS1::kanMX4 ho::TEF1<sup>P</sup>-MTS-TagBFP (mtBFP)::natNT2</i>                             |
| 111 | <i>MATa his3Δ0 leu2Δ0 met15Δ0 ura3Δ0 get3::hphNT1 his3::GOS1<sup>P</sup>-GFP-GOS1::kanMX4 ho::TEF1<sup>P</sup>-MTS-TagBFP (mtBFP)::natNT2</i>                |
| 112 | <i>MATa his3Δ0 leu2Δ0 met15Δ0 ura3Δ0 msp1::SpHIS5 his3::GOS1<sup>P</sup>-GFP-GOS1::kanMX4 ho::TEF1<sup>P</sup>-MTS-TagBFP (mtBFP)::natNT2</i>                |
| 113 | <i>MATa his3Δ0 leu2Δ0 met15Δ0 ura3Δ0 get3::hphNT1 msp1::SpHIS5 his3::GOS1<sup>P</sup>-GFP-GOS1::kanMX4 ho::TEF1<sup>P</sup>-MTS-TagBFP (mtBFP)::natNT2</i>   |
| 114 | <i>MATa his3Δ0 leu2Δ0 met15Δ0 ura3Δ0 his3::SPS2<sup>P</sup>-GFP-SPS2::kanMX4 ho::TEF1<sup>P</sup>-MTS-TagBFP (mtBFP)::natNT2</i>                             |
| 115 | <i>MATa his3Δ0 leu2Δ0 met15Δ0 ura3Δ0 get3::hphNT1 his3::SPS2<sup>P</sup>-GFP-SPS2::kanMX4 ho::TEF1<sup>P</sup>-MTS-TagBFP (mtBFP)::natNT2</i>                |
| 116 | <i>MATa his3Δ0 leu2Δ0 met15Δ0 ura3Δ0 msp1::SpHIS5 his3::SPS2<sup>P</sup>-GFP-SPS2::kanMX4 ho::TEF1<sup>P</sup>-MTS-TagBFP (mtBFP)::natNT2</i>                |

Table S2 Yeast Strains Used and Generated in This Study (Continued)

Strains generated in the background of BY4741

| NO. | Genotype                                                                                                                                                                    |
|-----|-----------------------------------------------------------------------------------------------------------------------------------------------------------------------------|
| 117 | <i>MATa his3Δ0 leu2Δ0 met15Δ0 ura3Δ0 get3::hphNT1 msp1::SpHIS5 his3::SPS2<sup>P</sup>-GFP-SPS2::kanMX4 ho::TEF1<sup>P</sup>-MTS-TagBFP (mtBFP)::natNT2</i>                  |
| 118 | <i>MATa his3Δ0 leu2Δ0 met15Δ0 ura3Δ0 his3::YSY6<sup>P</sup>-GFP-YSY6::kanMX4 ho::TEF1<sup>P</sup>-MTS-TagBFP (mtBFP)::natNT2</i>                                            |
| 119 | <i>MATa his3Δ0 leu2Δ0 met15Δ0 ura3Δ0 get3::hphNT1 his3::YSY6<sup>P</sup>-GFP-YSY6::kanMX4 ho::TEF1<sup>P</sup>-MTS-TagBFP (mtBFP)::natNT2</i>                               |
| 120 | <i>MATa his3Δ0 leu2Δ0 met15Δ0 ura3Δ0 msp1::SpHIS5 his3::YSY6<sup>P</sup>-GFP-YSY6::kanMX4 ho::TEF1<sup>P</sup>-MTS-TagBFP (mtBFP)::natNT2</i>                               |
| 121 | <i>MATa his3Δ0 leu2Δ0 met15Δ0 ura3Δ0 get3::hphNT1 msp1::SpHIS5 his3::YSY6<sup>P</sup>-GFP-YSY6::kanMX4 ho::TEF1<sup>P</sup>-MTS-TagBFP (mtBFP)::natNT2</i>                  |
| 122 | <i>MATa his3Δ0 leu2Δ0 met15Δ0 ura3Δ0 his3::SSS1<sup>P</sup>-GFP-SSS1::kanMX4 ho::TEF1<sup>P</sup>-MTS-TagBFP (mtBFP)::natNT2</i>                                            |
| 123 | <i>MATa his3Δ0 leu2Δ0 met15Δ0 ura3Δ0 get3::hphNT1 his3::SSS1<sup>P</sup>-GFP-SSS1::kanMX4 ho::TEF1<sup>P</sup>-MTS-TagBFP (mtBFP)::natNT2</i>                               |
| 124 | <i>MATa his3Δ0 leu2Δ0 met15Δ0 ura3Δ0 msp1::SpHIS5 his3::SSS1<sup>P</sup>-GFP-SSS1::kanMX4 ho::TEF1<sup>P</sup>-MTS-TagBFP (mtBFP)::natNT2</i>                               |
| 125 | <i>MATa his3Δ0 leu2Δ0 met15Δ0 ura3Δ0 get3::hphNT1 msp1::SpHIS5 his3::SSS1<sup>P</sup>-GFP-SSS1::kanMX4 ho::TEF1<sup>P</sup>-MTS-TagBFP (mtBFP)::natNT2</i>                  |
| 126 | <i>MATa his3Δ0 leu2Δ0 met15Δ0 ura3Δ0 get3::hphNT1 msp1::MSP1-FLAG::LEU2 his3::FRT1<sup>P</sup>-GFP-FRT1::kanMX4 ho::TEF1<sup>P</sup>-MTS-TagBFP (mtBFP)::natNT2</i>         |
| 127 | <i>MATa his3Δ0 leu2Δ0 met15Δ0 ura3Δ0 get3::hphNT1 msp1::msp1 (E193Q)-FLAG::LEU2 his3::FRT1<sup>P</sup>-GFP-FRT1::kanMX4 ho::TEF1<sup>P</sup>-MTS-TagBFP (mtBFP)::natNT2</i> |
| 128 | <i>MATa his3Δ0 leu2Δ0 met15Δ0 ura3Δ0 get3::hphNT1 msp1::msp1 (D12T)-FLAG::LEU2 his3::FRT1<sup>P</sup>-GFP-FRT1::kanMX4 ho::TEF1<sup>P</sup>-MTS-TagBFP (mtBFP)::natNT2</i>  |
| 129 | <i>MATa his3Δ0 leu2Δ0 met15Δ0 ura3Δ0 get3::hphNT1 msp1::msp1 (L69A)-FLAG::LEU2 his3::FRT1<sup>P</sup>-GFP-FRT1::kanMX4 ho::TEF1<sup>P</sup>-MTS-TagBFP (mtBFP)::natNT2</i>  |
| 130 | <i>MATa his3Δ0 leu2Δ0 met15Δ0 ura3Δ0 get3::hphNT1 msp1::msp1 (Y72A)-FLAG::LEU2 his3::FRT1<sup>P</sup>-GFP-FRT1::kanMX4 ho::TEF1<sup>P</sup>-MTS-TagBFP (mtBFP)::natNT2</i>  |
| 131 | <i>MATa his3Δ0 leu2Δ0 met15Δ0 ura3Δ0 get3::hphNT1 msp1::msp1 (E73A)-FLAG::LEU2 his3::FRT1<sup>P</sup>-GFP-FRT1::kanMX4 ho::TEF1<sup>P</sup>-MTS-TagBFP (mtBFP)::natNT2</i>  |
| 132 | <i>MATa his3Δ0 leu2Δ0 met15Δ0 ura3Δ0 get3::hphNT1 msp1::msp1 (L77A)-FLAG::LEU2 his3::FRT1<sup>P</sup>-GFP-FRT1::kanMX4 ho::TEF1<sup>P</sup>-MTS-TagBFP (mtBFP)::natNT2</i>  |
| 133 | <i>MATa his3Δ0 leu2Δ0 met15Δ0 ura3Δ0 get3::hphNT1 msp1::msp1 (V81A)-FLAG::LEU2 his3::FRT1<sup>P</sup>-GFP-FRT1::kanMX4 ho::TEF1<sup>P</sup>-MTS-TagBFP (mtBFP)::natNT2</i>  |
| 134 | <i>MATa his3Δ0 leu2Δ0 met15Δ0 ura3Δ0 get3::hphNT1 msp1::msp1 (I86A)-FLAG::LEU2 his3::FRT1<sup>P</sup>-GFP-FRT1::kanMX4 ho::TEF1<sup>P</sup>-MTS-TagBFP (mtBFP)::natNT2</i>  |
| 135 | <i>MATa his3Δ0 leu2Δ0 met15Δ0 ura3Δ0 get3::hphNT1 msp1::msp1 (I93A)-FLAG::LEU2 his3::FRT1<sup>P</sup>-GFP-FRT1::kanMX4 ho::TEF1<sup>P</sup>-MTS-TagBFP (mtBFP)::natNT2</i>  |
| 136 | <i>MATa his3Δ0 leu2Δ0 met15Δ0 ura3Δ0 get3::hphNT1 msp1::msp1 (G94A)-FLAG::LEU2 his3::FRT1<sup>P</sup>-GFP-FRT1::kanMX4 ho::TEF1<sup>P</sup>-MTS-TagBFP (mtBFP)::natNT2</i>  |
| 137 | <i>MATa his3Δ0 leu2Δ0 met15Δ0 ura3Δ0 get3::hphNT1 msp1::msp1 (G95A)-FLAG::LEU2 his3::FRT1<sup>P</sup>-GFP-FRT1::kanMX4 ho::TEF1<sup>P</sup>-MTS-TagBFP (mtBFP)::natNT2</i>  |
| 138 | <i>MATa his3Δ0 leu2Δ0 met15Δ0 ura3Δ0 get3::hphNT1 msp1::msp1 (L96A)-FLAG::LEU2 his3::FRT1<sup>P</sup>-GFP-FRT1::kanMX4 ho::TEF1<sup>P</sup>-MTS-TagBFP (mtBFP)::natNT2</i>  |
| 139 | <i>MATa his3Δ0 leu2Δ0 met15Δ0 ura3Δ0 get3::hphNT1 msp1::MSP1-FLAG::LEU2 his3::YSY6<sup>P</sup>-GFP-YSY6::kanMX4 ho::TEF1<sup>P</sup>-MTS-TagBFP (mtBFP)::natNT2</i>         |
| 140 | <i>MATa his3Δ0 leu2Δ0 met15Δ0 ura3Δ0 get3::hphNT1 msp1::msp1 (E193Q)-FLAG::LEU2 his3::YSY6<sup>P</sup>-GFP-YSY6::kanMX4 ho::TEF1<sup>P</sup>-MTS-TagBFP (mtBFP)::natNT2</i> |
| 141 | <i>MATa his3Δ0 leu2Δ0 met15Δ0 ura3Δ0 get3::hphNT1 msp1::msp1 (D12T)-FLAG::LEU2 his3::YSY6<sup>P</sup>-GFP-YSY6::kanMX4 ho::TEF1<sup>P</sup>-MTS-TagBFP (mtBFP)::natNT2</i>  |
| 142 | <i>MATa his3Δ0 leu2Δ0 met15Δ0 ura3Δ0 get3::hphNT1 msp1::msp1 (L69A)-FLAG::LEU2 his3::YSY6<sup>P</sup>-GFP-YSY6::kanMX4 ho::TEF1<sup>P</sup>-MTS-TagBFP (mtBFP)::natNT2</i>  |
| 143 | <i>MATa his3Δ0 leu2Δ0 met15Δ0 ura3Δ0 get3::hphNT1 msp1::msp1 (Y72A)-FLAG::LEU2 his3::YSY6<sup>P</sup>-GFP-YSY6::kanMX4 ho::TEF1<sup>P</sup>-MTS-TagBFP (mtBFP)::natNT2</i>  |
| 144 | <i>MATa his3Δ0 leu2Δ0 met15Δ0 ura3Δ0 get3::hphNT1 msp1::msp1 (E73A)-FLAG::LEU2 his3::YSY6<sup>P</sup>-GFP-YSY6::kanMX4 ho::TEF1<sup>P</sup>-MTS-TagBFP (mtBFP)::natNT2</i>  |
| 145 | <i>MATa his3Δ0 leu2Δ0 met15Δ0 ura3Δ0 get3::hphNT1 msp1::msp1 (L77A)-FLAG::LEU2 his3::YSY6<sup>P</sup>-GFP-YSY6::kanMX4 ho::TEF1<sup>P</sup>-MTS-TagBFP (mtBFP)::natNT2</i>  |

Table S2 Yeast Strains Used and Generated in This Study (Continued)

Strains generated in the background of BY4741

| NO. | Genotype                                                                                                                                                                         |
|-----|----------------------------------------------------------------------------------------------------------------------------------------------------------------------------------|
| 146 | <i>MATa his3Δ0 leu2Δ0 met15Δ0 ura3Δ0 get3::hphNT1 msp1::msp1 (V81A)-FLAG::LEU2 his3::YSY6<sup>P</sup>-GFP-YSY6::kanMX4 ho::TEF1<sup>P</sup>-MTS-TagBFP (mtBFP)::natNT2</i>       |
| 147 | <i>MATa his3Δ0 leu2Δ0 met15Δ0 ura3Δ0 get3::hphNT1 msp1::msp1 (I86A)-FLAG::LEU2 his3::YSY6<sup>P</sup>-GFP-YSY6::kanMX4 ho::TEF1<sup>P</sup>-MTS-TagBFP (mtBFP)::natNT2</i>       |
| 148 | <i>MATa his3Δ0 leu2Δ0 met15Δ0 ura3Δ0 get3::hphNT1 msp1::msp1 (I93A)-FLAG::LEU2 his3::YSY6<sup>P</sup>-GFP-YSY6::kanMX4 ho::TEF1<sup>P</sup>-MTS-TagBFP (mtBFP)::natNT2</i>       |
| 149 | <i>MATa his3Δ0 leu2Δ0 met15Δ0 ura3Δ0 get3::hphNT1 msp1::msp1 (G94A)-FLAG::LEU2 his3::YSY6<sup>P</sup>-GFP-YSY6::kanMX4 ho::TEF1<sup>P</sup>-MTS-TagBFP (mtBFP)::natNT2</i>       |
| 150 | <i>MATa his3Δ0 leu2Δ0 met15Δ0 ura3Δ0 get3::hphNT1 msp1::msp1 (G95A)-FLAG::LEU2 his3::YSY6<sup>P</sup>-GFP-YSY6::kanMX4 ho::TEF1<sup>P</sup>-MTS-TagBFP (mtBFP)::natNT2</i>       |
| 151 | <i>MATa his3Δ0 leu2Δ0 met15Δ0 ura3Δ0 get3::hphNT1 msp1::msp1 (L96A)-FLAG::LEU2 his3::YSY6<sup>P</sup>-GFP-YSY6::kanMX4 ho::TEF1<sup>P</sup>-MTS-TagBFP (mtBFP)::natNT2</i>       |
| 152 | <i>MATa his3Δ0 leu2Δ0 met15Δ0 ura3Δ0 his3::PEX15<sup>P</sup>-GFP-PEX15::kanMX4 pex3::PEX3-mRFP::hphNT1</i>                                                                       |
| 153 | <i>MATa his3Δ0 leu2Δ0 met15Δ0 ura3Δ0 his3::PEX15<sup>P</sup>-GFP-PEX15::kanMX4 pex3::PEX3-mRFP::hphNT1 get3::KIURA3</i>                                                          |
| 154 | <i>MATa his3Δ0 leu2Δ0 met15Δ0 ura3Δ0 his3::PEX15<sup>P</sup>-GFP-PEX15::kanMX4 pex3::PEX3-mRFP::hphNT1 msp1::SpHIS5</i>                                                          |
| 155 | <i>MATa his3Δ0 leu2Δ0 met15Δ0 ura3Δ0 his3::PEX15<sup>P</sup>-GFP-PEX15::kanMX4 pex3::PEX3-mRFP::hphNT1 get3::KIURA3 msp1::SpHIS5</i>                                             |
| 156 | <i>MATa his3Δ0 leu2Δ0 met15Δ0 ura3Δ0 get3::hphNT1 msp1::SpHIS5 his3::FRT1<sup>P</sup>-GFP-<i>frt1</i> (K593N, R598Q)::kanMX4 ho::TEF1<sup>P</sup>-MTS-TagBFP (mtBFP)::natNT2</i> |
| 157 | <i>MATa his3Δ0 leu2Δ0 met15Δ0 ura3Δ0 msp1::msp1 (D12A)-FLAG::LEU2</i>                                                                                                            |
| 158 | <i>MATa his3Δ0 leu2Δ0 met15Δ0 ura3Δ0 msp1::msp1 (D12E)-FLAG::LEU2</i>                                                                                                            |
| 159 | <i>MATa his3Δ0 leu2Δ0 met15Δ0 ura3Δ0 msp1::msp1 (D12K)-FLAG::LEU2</i>                                                                                                            |
| 160 | <i>MATa his3Δ0 leu2Δ0 met15Δ0 ura3Δ0 cim3::cim3-1 (G551A)::kanMX6</i>                                                                                                            |
| 161 | <i>MATa his3Δ0 leu2Δ0 met15Δ0 ura3Δ0 cim3::cim3-1 (G551A)::kanMX6 msp1::hphNT1</i>                                                                                               |
| 162 | <i>MATa his3Δ0 leu2Δ0 met15Δ0 ura3Δ0 cim3::cim3-1(G551A)::kanMX6 msp1::MSP1-FLAG::LEU2</i>                                                                                       |
| 163 | <i>MATa his3Δ0 leu2Δ0 met15Δ0 ura3Δ0 cim3::cim3-1(G551A)::kanMX6 msp1::msp1 (E193Q)-FLAG::LEU2</i>                                                                               |
| 164 | <i>MATa his3Δ0 leu2Δ0 met15Δ0 ura3Δ0 pex19::KIURA3 ho::TEF1P-MTS-TagBFP (mtBFP)::natNT2</i>                                                                                      |
| 165 | <i>MATa his3Δ0 leu2Δ0 met15Δ0 ura3Δ0 pex19::KIURA3 msp1::kanMX6 ho::TEF1P-MTS-TagBFP (mtBFP)::natNT2</i>                                                                         |
| 166 | <i>MATa his3Δ0 leu2Δ0 met15Δ0 ura3Δ0 pex19::KIURA3 get3::kanMX6 ho::TEF1P-MTS-TagBFP (mtBFP)::natNT2</i>                                                                         |
| 167 | <i>MATa his3Δ0 leu2Δ0 met15Δ0 ura3Δ0 msp1::kanMX6 get3::hphNT1 pex19::KIURA3 ho::TEF1P-MTS-TagBFP (mtBFP)::natNT2</i>                                                            |
| 168 | <i>MATa his3Δ0 leu2Δ0 met15Δ0 ura3Δ0 pex19::KIURA3 msp1::MSP1-FLAG::LEU2 ho::TEF1P-MTS-TagBFP (mtBFP)::natNT2</i>                                                                |
| 169 | <i>MATa his3Δ0 leu2Δ0 met15Δ0 ura3Δ0 pex19::KIURA3 msp1::msp1 (E193Q)-FLAG::LEU2 ho::TEF1P-MTS-TagBFP (mtBFP)::natNT2</i>                                                        |
| 170 | <i>MATa his3Δ0 leu2Δ0 met15Δ0 ura3Δ0 pex19::KIURA3 msp1::msp1 (D12T)-FLAG::LEU2 ho::TEF1P-MTS-TagBFP (mtBFP)::natNT2</i>                                                         |
| 171 | <i>MATa his3Δ0 leu2Δ0 met15Δ0 ura3Δ0 pex19::KIURA3 msp1::msp1 (Y72A)-FLAG::LEU2 ho::TEF1P-MTS-TagBFP (mtBFP)::natNT2</i>                                                         |
| 172 | <i>MATa his3Δ0 leu2Δ0 met15Δ0 ura3Δ0 pex19::KIURA3 msp1::msp1 (V81A)-FLAG::LEU2 ho::TEF1P-MTS-TagBFP (mtBFP)::natNT2</i>                                                         |
| 173 | <i>MATa his3Δ0 leu2Δ0 met15Δ0 ura3Δ0 pex19::KIURA3 msp1::msp1 (I86A)-FLAG::LEU2 ho::TEF1P-MTS-TagBFP (mtBFP)::natNT2</i>                                                         |
| 174 | <i>MATa his3Δ0 leu2Δ0 met15Δ0 ura3Δ0 pex19::KIURA3 msp1::msp1 (I93A)-FLAG::LEU2 ho::TEF1P-MTS-TagBFP (mtBFP)::natNT2</i>                                                         |

Table S2 Yeast Strains Used and Generated in This Study (Continued)

Strains generated in the background of BY4741

| NO. | Genotype                                                                                                                               |
|-----|----------------------------------------------------------------------------------------------------------------------------------------|
| 175 | <i>MATa his3Δ0 leu2Δ0 met15Δ0 ura3Δ0 pex19::KIURA3 get3::hphNT1 msp1::MSP1-FLAG::LEU2 ho::TEF1P-MTS-TagBFP (mtBFP)::natNT2</i>         |
| 176 | <i>MATa his3Δ0 leu2Δ0 met15Δ0 ura3Δ0 pex19::KIURA3 get3::hphNT1 msp1::msp1 (E193Q)-FLAG::LEU2 ho::TEF1P-MTS-TagBFP (mtBFP)::natNT2</i> |
| 177 | <i>MATa his3Δ0 leu2Δ0 met15Δ0 ura3Δ0 pex19::KIURA3 get3::hphNT1 msp1::msp1 (D12T)-FLAG::LEU2 ho::TEF1P-MTS-TagBFP (mtBFP)::natNT2</i>  |
| 178 | <i>MATa his3Δ0 leu2Δ0 met15Δ0 ura3Δ0 pex19::KIURA3 get3::hphNT1 msp1::msp1 (V81A)-FLAG::LEU2 ho::TEF1P-MTS-TagBFP (mtBFP)::natNT2</i>  |



Table S2 Yeast Strains Used and Generated in This Study (Continued)

Strains generated in other strain backgrounds

| NO. | Genotype                                                                                                                                             | Strain Background |
|-----|------------------------------------------------------------------------------------------------------------------------------------------------------|-------------------|
| 1   | <i>MATa leu2-3,112 trp1-1 can1-100 ura3-1 ade2-1 his3-11,15 msp1::MSP1-FLAG::LEU2</i>                                                                | W303-1A           |
| 2   | <i>MATa leu2-3,112 trp1-1 can1-100 ura3-1 ade2-1 his3-11,15 msp1::msp1 (E193Q)-FLAG::LEU2</i>                                                        | W303-1A           |
| 3   | <i>MATa leu2-3,112 trp1-1 can1-100 ura3-1 ade2-1 his3::GAL1<sup>P</sup>-msp1 (90TAG)-FLAG::kanMX4</i>                                                | W303-1A           |
| 4   | <i>MATa leu2-3,112 trp1-1 can1-100 ura3-1 ade2-1 his3::GAL1<sup>P</sup>-msp1 (90TAG)-GFP::kanMX4 ho::TEF1<sup>P</sup>-MTS-TagBFP (mtBFP)::natNT2</i> | W303-1A           |
| 5   | <i>MATa leu2-3,112 trp1-1 can1-100 ura3-1 ade2-1 his3-11,15 msp1::kanMX4</i>                                                                         | W303-1A           |
| 6   | <i>MATa leu2-3,112 trp1-1 can1-100 ura3-1 ade2-1 his3::GAL1<sup>P</sup>-msp1 (E193Q, 90TAG)-FLAG::kanMX4</i>                                         | W303-1A           |
| 7   | <i>MATa leu2-3,112 trp1-1 can1-100 ura3-1 ade2-1 his3::GAL1<sup>P</sup>-msp1 (E193Q, 166TAG)-FLAG::kanMX4</i>                                        | W303-1A           |
| 8   | <i>MATa leu2-3,112 trp1-1 can1-100 ura3-1 ade2-1 his3::GAL1<sup>P</sup>-msp1 (E193Q, 167TAG)-FLAG::kanMX4</i>                                        | W303-1A           |
| 9   | <i>MATa leu2-3,112 trp1-1 can1-100 ura3-1 ade2-1 his3::GAL1<sup>P</sup>-msp1 (E193Q, 168TAG)-FLAG::kanMX4</i>                                        | W303-1A           |
| 10  | <i>MATa leu2-3,112 trp1-1 can1-100 ura3-1 ade2-1 his3::GAL1<sup>P</sup>-msp1 (E193Q, 169TAG)-FLAG::kanMX4</i>                                        | W303-1A           |
| 11  | <i>MATa leu2-3,112 trp1-1 can1-100 ura3-1 ade2-1 his3::GAL1<sup>P</sup>-msp1 (E193Q, 199TAG)-FLAG::kanMX4</i>                                        | W303-1A           |
| 12  | <i>MATa leu2-3,112 trp1-1 can1-100 ura3-1 ade2-1 his3::GAL1<sup>P</sup>-msp1 (E193Q, 201TAG)-FLAG::kanMX4</i>                                        | W303-1A           |
| 13  | <i>MATa leu2-3,112 trp1-1 can1-100 ura3-1 ade2-1 his3::GAL1<sup>P</sup>-msp1 (E193Q, 203TAG)-FLAG::kanMX4</i>                                        | W303-1A           |
| 14  | <i>MATa leu2-3,112 trp1-1 can1-100 ura3-1 ade2-1 his3::GAL1<sup>P</sup>-msp1 (E193Q, 205TAG)-FLAG::kanMX4</i>                                        | W303-1A           |
| 15  | <i>MATa leu2-3,112 trp1-1 can1-100 ura3-1 ade2-1 his3::GAL1<sup>P</sup>-msp1 (E193Q, 207TAG)-FLAG::kanMX4</i>                                        | W303-1A           |
| 16  | <i>MATa leu2-3,112 trp1-1 can1-100 ura3-1 ade2-1 his3::GAL1<sup>P</sup>-msp1 (E193Q, 209TAG)-FLAG::kanMX4</i>                                        | W303-1A           |
| 17  | <i>MATa leu2-3,112 trp1-1 can1-100 ura3-1 ade2-1 his3::GAL1<sup>P</sup>-msp1 (E193Q, 241TAG)-FLAG::kanMX4</i>                                        | W303-1A           |
| 18  | <i>MATa leu2-3,112 trp1-1 can1-100 ura3-1 ade2-1 his3::GAL1<sup>P</sup>-msp1 (E193Q, 243TAG)-FLAG::kanMX4</i>                                        | W303-1A           |
| 19  | <i>MATa leu2-3,112 trp1-1 can1-100 ura3-1 ade2-1 his3::GAL1<sup>P</sup>-msp1 (E193Q, 2TAG)-FLAG::kanMX4</i>                                          | W303-1A           |
| 20  | <i>MATa leu2-3,112 trp1-1 can1-100 ura3-1 ade2-1 his3::GAL1<sup>P</sup>-msp1 (E193Q, 3TAG)-FLAG::kanMX4</i>                                          | W303-1A           |
| 21  | <i>MATa leu2-3,112 trp1-1 can1-100 ura3-1 ade2-1 his3::GAL1<sup>P</sup>-msp1 (E193Q, 5TAG)-FLAG::kanMX4</i>                                          | W303-1A           |
| 22  | <i>MATa leu2-3,112 trp1-1 can1-100 ura3-1 ade2-1 his3::GAL1<sup>P</sup>-msp1 (E193Q, 6TAG)-FLAG::kanMX4</i>                                          | W303-1A           |
| 23  | <i>MATa leu2-3,112 trp1-1 can1-100 ura3-1 ade2-1 his3::GAL1<sup>P</sup>-msp1 (E193Q, 7TAG)-FLAG::kanMX4</i>                                          | W303-1A           |
| 24  | <i>MATa leu2-3,112 trp1-1 can1-100 ura3-1 ade2-1 his3::GAL1<sup>P</sup>-msp1 (E193Q, 8TAG)-FLAG::kanMX4</i>                                          | W303-1A           |
| 25  | <i>MATa leu2-3,112 trp1-1 can1-100 ura3-1 ade2-1 his3::GAL1<sup>P</sup>-msp1 (E193Q, 9TAG)-FLAG::kanMX4</i>                                          | W303-1A           |
| 26  | <i>MATa leu2-3,112 trp1-1 can1-100 ura3-1 ade2-1 his3::GAL1<sup>P</sup>-msp1 (E193Q, 10TAG)-FLAG::kanMX4</i>                                         | W303-1A           |
| 27  | <i>MATa leu2-3,112 trp1-1 can1-100 ura3-1 ade2-1 his3::GAL1<sup>P</sup>-msp1 (E193Q, 11TAG)-FLAG::kanMX4</i>                                         | W303-1A           |
| 28  | <i>MATa leu2-3,112 trp1-1 can1-100 ura3-1 ade2-1 his3::GAL1<sup>P</sup>-msp1 (E193Q, 13TAG)-FLAG::kanMX4</i>                                         | W303-1A           |

Table S2 Yeast Strains Used and Generated in This Study (Continued)

Strains generated in other strain backgrounds

| NO. | Genotype                                                                                                     | Strain Background |
|-----|--------------------------------------------------------------------------------------------------------------|-------------------|
| 29  | <i>MATa leu2-3,112 trp1-1 can1-100 ura3-1 ade2-1 his3::GAL1<sup>P</sup>-msp1 (E193Q, 15TAG)-FLAG::kanMX4</i> | W303-1A           |
| 30  | <i>MATa leu2-3,112 trp1-1 can1-100 ura3-1 ade2-1 his3::GAL1<sup>P</sup>-msp1 (E193Q, 17TAG)-FLAG::kanMX4</i> | W303-1A           |
| 31  | <i>MATa leu2-3,112 trp1-1 can1-100 ura3-1 ade2-1 his3::GAL1<sup>P</sup>-msp1 (E193Q, 20TAG)-FLAG::kanMX4</i> | W303-1A           |
| 32  | <i>MATa leu2-3,112 trp1-1 can1-100 ura3-1 ade2-1 his3::GAL1<sup>P</sup>-msp1 (E193Q, 21TAG)-FLAG::kanMX4</i> | W303-1A           |
| 33  | <i>MATa leu2-3,112 trp1-1 can1-100 ura3-1 ade2-1 his3::GAL1<sup>P</sup>-msp1 (E193Q, 22TAG)-FLAG::kanMX4</i> | W303-1A           |
| 34  | <i>MATa leu2-3,112 trp1-1 can1-100 ura3-1 ade2-1 his3::GAL1<sup>P</sup>-msp1 (E193Q, 23TAG)-FLAG::kanMX4</i> | W303-1A           |
| 35  | <i>MATa leu2-3,112 trp1-1 can1-100 ura3-1 ade2-1 his3::GAL1<sup>P</sup>-msp1 (E193Q, 25TAG)-FLAG::kanMX4</i> | W303-1A           |
| 36  | <i>MATa leu2-3,112 trp1-1 can1-100 ura3-1 ade2-1 his3::GAL1<sup>P</sup>-msp1 (E193Q, 26TAG)-FLAG::kanMX4</i> | W303-1A           |
| 37  | <i>MATa leu2-3,112 trp1-1 can1-100 ura3-1 ade2-1 his3::GAL1<sup>P</sup>-msp1 (E193Q, 29TAG)-FLAG::kanMX4</i> | W303-1A           |
| 38  | <i>MATa leu2-3,112 trp1-1 can1-100 ura3-1 ade2-1 his3::GAL1<sup>P</sup>-msp1 (E193Q, 32TAG)-FLAG::kanMX4</i> | W303-1A           |
| 39  | <i>MATa leu2-3,112 trp1-1 can1-100 ura3-1 ade2-1 his3::GAL1<sup>P</sup>-msp1 (E193Q, 38TAG)-FLAG::kanMX4</i> | W303-1A           |
| 40  | <i>MATa leu2-3,112 trp1-1 can1-100 ura3-1 ade2-1 his3::GAL1<sup>P</sup>-msp1 (E193Q, 41TAG)-FLAG::kanMX4</i> | W303-1A           |
| 41  | <i>MATa leu2-3,112 trp1-1 can1-100 ura3-1 ade2-1 his3::GAL1<sup>P</sup>-msp1 (E193Q, 47TAG)-FLAG::kanMX4</i> | W303-1A           |
| 42  | <i>MATa leu2-3,112 trp1-1 can1-100 ura3-1 ade2-1 his3::GAL1<sup>P</sup>-msp1 (E193Q, 50TAG)-FLAG::kanMX4</i> | W303-1A           |
| 43  | <i>MATa leu2-3,112 trp1-1 can1-100 ura3-1 ade2-1 his3::GAL1<sup>P</sup>-msp1 (E193Q, 53TAG)-FLAG::kanMX4</i> | W303-1A           |
| 44  | <i>MATa leu2-3,112 trp1-1 can1-100 ura3-1 ade2-1 his3::GAL1<sup>P</sup>-msp1 (E193Q, 56TAG)-FLAG::kanMX4</i> | W303-1A           |
| 45  | <i>MATa leu2-3,112 trp1-1 can1-100 ura3-1 ade2-1 his3::GAL1<sup>P</sup>-msp1 (E193Q, 59TAG)-FLAG::kanMX4</i> | W303-1A           |
| 46  | <i>MATa leu2-3,112 trp1-1 can1-100 ura3-1 ade2-1 his3::GAL1<sup>P</sup>-msp1 (E193Q, 62TAG)-FLAG::kanMX4</i> | W303-1A           |
| 47  | <i>MATa leu2-3,112 trp1-1 can1-100 ura3-1 ade2-1 his3::GAL1<sup>P</sup>-msp1 (E193Q, 65TAG)-FLAG::kanMX4</i> | W303-1A           |
| 48  | <i>MATa leu2-3,112 trp1-1 can1-100 ura3-1 ade2-1 his3::GAL1<sup>P</sup>-msp1 (E193Q, 68TAG)-FLAG::kanMX4</i> | W303-1A           |
| 49  | <i>MATa leu2-3,112 trp1-1 can1-100 ura3-1 ade2-1 his3::GAL1<sup>P</sup>-msp1 (E193Q, 71TAG)-FLAG::kanMX4</i> | W303-1A           |
| 50  | <i>MATa leu2-3,112 trp1-1 can1-100 ura3-1 ade2-1 his3::GAL1<sup>P</sup>-msp1 (E193Q, 77TAG)-FLAG::kanMX4</i> | W303-1A           |
| 51  | <i>MATa leu2-3,112 trp1-1 can1-100 ura3-1 ade2-1 his3::GAL1<sup>P</sup>-msp1 (E193Q, 80TAG)-FLAG::kanMX4</i> | W303-1A           |
| 52  | <i>MATa leu2-3,112 trp1-1 can1-100 ura3-1 ade2-1 his3::GAL1<sup>P</sup>-msp1 (E193Q, 83TAG)-FLAG::kanMX4</i> | W303-1A           |
| 53  | <i>MATa leu2-3,112 trp1-1 can1-100 ura3-1 ade2-1 his3::GAL1<sup>P</sup>-msp1 (E193Q, 86TAG)-FLAG::kanMX4</i> | W303-1A           |
| 54  | <i>MATa leu2-3,112 trp1-1 can1-100 ura3-1 ade2-1 his3::GAL1<sup>P</sup>-msp1 (E193Q, 89TAG)-FLAG::kanMX4</i> | W303-1A           |
| 55  | <i>MATa leu2-3,112 trp1-1 can1-100 ura3-1 ade2-1 his3::GAL1<sup>P</sup>-msp1 (E193Q, 92TAG)-FLAG::kanMX4</i> | W303-1A           |
| 56  | <i>MATa leu2-3,112 trp1-1 can1-100 ura3-1 ade2-1 his3::GAL1<sup>P</sup>-msp1 (E193Q, 95TAG)-FLAG::kanMX4</i> | W303-1A           |
| 57  | <i>MATa leu2-3,112 trp1-1 can1-100 ura3-1 ade2-1 his3::GAL1<sup>P</sup>-msp1 (E193Q, 98TAG)-FLAG::kanMX4</i> | W303-1A           |

Table S3 Plasmids used in this study

| No | plasmid name                       | parent vector | insert composition |            |                                                       |
|----|------------------------------------|---------------|--------------------|------------|-------------------------------------------------------|
|    |                                    |               | promoter           | terminator | ORF                                                   |
| 1  | pRS426-TEF1p-HA-UB                 | pRS426        | TEF1p              | CYCt       | HA-UBIQUITIN                                          |
| 2  | pRS416-MSP1p-MSP1-GFP              | pRS416        | MSP1p              | ADH1t      | MSP1-GFP                                              |
| 3  | NAT-TEF1p-GFP-PEX15Δ30             | p417-CYC1     | TEF1p              | CYCt       | GFP-PEX15 (1-353aa)                                   |
| 4  | NAT-TEF1p-GFP-PEX15(C)-TOM5 (OTS)  | p417-CYC1     | TEF1p              | CYCt       | GFP-PEX15 (1-324aa)-TOM5 (23-50aa)                    |
| 5  | NAT-TEF1p-GFP-PEX15(C)-GEM1 (OTS)  | p417-CYC1     | TEF1p              | CYCt       | GFP-PEX15 (1-324aa)-GEM1 (629-662aa)                  |
| 6  | NAT-TEF1p-GFP-PEX15(C)-FIS1 (OTS)  | p417-CYC1     | TEF1p              | CYCt       | GFP-PEX15 (1-324aa)-FIS1 (126-155aa)                  |
| 7  | NAT-TEF1p-GFP-PEX15(C)-TOM6 (OTS)  | p417-CYC1     | TEF1p              | CYCt       | GFP-PEX15 (1-324aa)-TOM6 (27-61aa)                    |
| 8  | NAT-TEF1p-GFP-PEX15(C)-TOM22 (OTS) | p417-CYC1     | TEF1p              | CYCt       | GFP-PEX15 (1-324aa)-TOM22 (73-119aa)                  |
| 9  | NAT-TEF1p-GFP-GEM1                 | p417-CYC1     | TEF1p              | CYCt       | GFP-GEM1                                              |
| 10 | NAT-TEF1p-GFP-GEM1-Ins             | p417-CYC1     | TEF1p              | CYCt       | GFP-GEM1 (1-628aa)-PEX15 (312-324aa)-GEM1 (629-662aa) |
| 11 | NAT-TEF1p-GFP-FIS1                 | p417-CYC1     | TEF1p              | CYCt       | GFP-FIS1                                              |
| 12 | NAT-TEF1p-GFP-FIS1-Ins             | p417-CYC1     | TEF1p              | CYCt       | GFP-FIS1 (1-125aa)-PEX15 (312-324aa)-FIS1 (126-155aa) |
| 13 | pRS426-GAL1p-GFP-3xHA-PEX15Δ30     | pRS426        | GAL1p              | CYCt       | GFP-3xHA-PEX15 (1-353aa)                              |
| 14 | pRS416-GAL1p-GFP-3xHA-PEX15Δ30     | pRS416        | GAL1p              | CYCt       | GFP-3xHA-PEX15 (1-353aa)                              |
| 15 | NAT-TEF1p-GFP-PEX15                | p417-CYC1     | TEF1p              | CYCt       | GFP-PEX15                                             |
| 16 | NAT-TEF1p-GFP-FRT1                 | p417-CYC1     | TEF1p              | CYCt       | GFP-FRT1                                              |
| 17 | NAT-TEF1p-GFP-SBH1                 | p417-CYC1     | TEF1p              | CYCt       | GFP-SBH1                                              |
| 18 | NAT-TEF1p-GFP-BOS1                 | p417-CYC1     | TEF1p              | CYCt       | GFP-BOS1                                              |
| 19 | NAT-TEF1p-GFP-VTI1                 | p417-CYC1     | TEF1p              | CYCt       | GFP-VTI1                                              |
| 20 | NAT-TEF1p-GFP-SSO1                 | p417-CYC1     | TEF1p              | CYCt       | GFP-SSO1                                              |
| 21 | NAT-TEF1p-GFP-PGC1                 | p417-CYC1     | TEF1p              | CYCt       | GFP-PGC1                                              |
| 22 | NAT-TEF1p-GFP-FRT2                 | p417-CYC1     | TEF1p              | CYCt       | GFP-FRT2                                              |
| 23 | NAT-TEF1p-GFP-SBH2                 | p417-CYC1     | TEF1p              | CYCt       | GFP-SBH2                                              |
| 24 | NAT-TEF1p-GFP-SEC22                | p417-CYC1     | TEF1p              | CYCt       | GFP-SEC22                                             |
| 25 | NAT-TEF1p-GFP-SFT1                 | p417-CYC1     | TEF1p              | CYCt       | GFP-SFT1                                              |
| 26 | NAT-TEF1p-GFP-PRM3                 | p417-CYC1     | TEF1p              | CYCt       | GFP-PRM3                                              |
| 27 | NAT-TEF1p-GFP-KAR1                 | p417-CYC1     | TEF1p              | CYCt       | GFP-KAR1                                              |
| 28 | NAT-TEF1p-GFP-YEL073C              | p417-CYC1     | TEF1p              | CYCt       | GFP-YEL073C                                           |
| 29 | NAT-TEF1p-GFP-YCL007C              | p417-CYC1     | TEF1p              | CYCt       | GFP-YCL007C                                           |
| 30 | NAT-TEF1p-GFP-SSS1                 | p417-CYC1     | TEF1p              | CYCt       | GFP-SSS1                                              |

Table S3 Plasmids used in this study (Continued)

| No | plasmid name          | parent vector | insert composition |            |             |
|----|-----------------------|---------------|--------------------|------------|-------------|
|    |                       |               | promoter           | terminator | ORF         |
| 31 | NAT-TEF1p-GFP-UBC6    | p417-CYC1     | TEF1p              | CYCt       | GFP-UBC6    |
| 32 | NAT-TEF1p-GFP-VPS64   | p417-CYC1     | TEF1p              | CYCt       | GFP-VPS64   |
| 33 | NAT-TEF1p-GFP-FAR10   | p417-CYC1     | TEF1p              | CYCt       | GFP-FAR10   |
| 34 | NAT-TEF1p-GFP-PHM6    | p417-CYC1     | TEF1p              | CYCt       | GFP-PHM6    |
| 35 | NAT-TEF1p-GFP-SCS2    | p417-CYC1     | TEF1p              | CYCt       | GFP-SCS2    |
| 36 | NAT-TEF1p-GFP-SNC1    | p417-CYC1     | TEF1p              | CYCt       | GFP-SNC1    |
| 37 | NAT-TEF1p-GFP-PEP12   | p417-CYC1     | TEF1p              | CYCt       | GFP-PEP12   |
| 38 | NAT-TEF1p-GFP-SSO2    | p417-CYC1     | TEF1p              | CYCt       | GFP-SSO2    |
| 39 | NAT-TEF1p-GFP-DPM1    | p417-CYC1     | TEF1p              | CYCt       | GFP-DPM1    |
| 40 | NAT-TEF1p-GFP-SNC2    | p417-CYC1     | TEF1p              | CYCt       | GFP-SNC2    |
| 41 | NAT-TEF1p-GFP-GOS1    | p417-CYC1     | TEF1p              | CYCt       | GFP-GOS1    |
| 42 | NAT-TEF1p-GFP-SPS2    | p417-CYC1     | TEF1p              | CYCt       | GFP-SPS2    |
| 43 | NAT-TEF1p-GFP-YSY6    | p417-CYC1     | TEF1p              | CYCt       | GFP-YSY6    |
| 44 | NAT-TEF1p-GFP-HLJ1    | p417-CYC1     | TEF1p              | CYCt       | GFP-HLJ1    |
| 45 | NAT-TEF1p-GFP-YDL241W | p417-CYC1     | TEF1p              | CYCt       | GFP-YDL241W |
| 46 | NAT-TEF1p-GFP-YJL119C | p417-CYC1     | TEF1p              | CYCt       | GFP-YJL119C |
| 47 | NAT-TEF1p-GFP-BET1    | p417-CYC1     | TEF1p              | CYCt       | GFP-BET1    |
| 48 | NAT-TEF1p-GFP-YEL010W | p417-CYC1     | TEF1p              | CYCt       | GFP-YEL010W |
| 49 | NAT-TEF1p-GFP-YBR016W | p417-CYC1     | TEF1p              | CYCt       | GFP-YBR016W |
| 50 | NAT-TEF1p-GFP-NYV1    | p417-CYC1     | TEF1p              | CYCt       | GFP-NYV1    |
| 51 | NAT-TEF1p-GFP-CYB5    | p417-CYC1     | TEF1p              | CYCt       | GFP-CYB5    |
| 52 | NAT-TEF1p-GFP-USE1    | p417-CYC1     | TEF1p              | CYCt       | GFP-USE1    |
| 53 | NAT-TEF1p-GFP-SED5    | p417-CYC1     | TEF1p              | CYCt       | GFP-SED5    |
| 54 | NAT-TEF1p-GFP-TLG1    | p417-CYC1     | TEF1p              | CYCt       | GFP-TLG     |
| 55 | NAT-TEF1p-GFP-SYN8    | p417-CYC1     | TEF1p              | CYCt       | GFP-SYN8    |
| 56 | NAT-TEF1p-GFP-VAM3    | p417-CYC1     | TEF1p              | CYCt       | GFP-VAM3    |
| 57 | NAT-TEF1p-GFP-YBL100C | p417-CYC1     | TEF1p              | CYCt       | GFP-YBL100C |
| 58 | NAT-TEF1p-GFP-SEC20   | p417-CYC1     | TEF1p              | CYCt       | GFP-SEC20   |
| 59 | NAT-TEF1p-GFP-UFE1    | p417-CYC1     | TEF1p              | CYCt       | GFP-UFE1    |
| 60 | NAT-TEF1p-GFP-CSM4    | p417-CYC1     | TEF1p              | CYCt       | GFP-CSM4    |

Table S3 Plasmids used in this study (Continued)

| No | plasmid name                          | parent vector | insert composition |            |                           |
|----|---------------------------------------|---------------|--------------------|------------|---------------------------|
|    |                                       |               | promoter           | terminator | ORF                       |
| 61 | NAT-TEF1p-GFP-TLG2                    | p417-CYC1     | TEF1p              | CYCt       | GFP-TLG2                  |
| 62 | NAT-TEF1p-GFP-YML036W                 | p417-CYC1     | TEF1p              | CYCt       | GFP-YML036W               |
| 63 | NAT-TEF1p-GFP-YDL012C                 | p417-CYC1     | TEF1p              | CYCt       | GFP-YDL012C               |
| 64 | NAT-TEF1p-mRFP-6xHA-PEX15 $\Delta$ 30 | p417-CYC1     | TEF1p              | CYCt       | mRFP-6xHA-PEX15 (1-353aa) |
